# Supplementary material
Source: PubMed Central journal article supplement (PMC3030811)
Supplement: supp_bbq069_Appendix_II.pdf [file supp_bbq069_Appendix_II.pdf]

## Simulation Study

### Number of true positives ranked in the top 30

|                  |          | Ranking Approach |     |          |               |
|------------------|----------|------------------|-----|----------|---------------|
|                  |          | Cox              | AFT | Additive | Nonparametric |
| Generating Model | Cox      | 23               | 13  | 15       | 21            |
|                  | AFT      | 13               | 24  | 11       | 22            |
|                  | Additive | 13               | 15  | 20       | 20            |

**Kendall tau correlation  $\text{Cor}(R1, R2)$ .** R1 is the rank of true positives under the approach that matches the data generating model. R2 is the rank of true positives under a specific approach.

|                  |          | Ranking Approach |       |          |               |
|------------------|----------|------------------|-------|----------|---------------|
|                  |          | Cox              | AFT   | Additive | Nonparametric |
| Generating Model | Cox      | 1                | 0.678 | 0.605    | 0.916         |
|                  | AFT      | 0.726            | 1     | 0.662    | 0.911         |
|                  | Additive | 0.532            | 0.617 | 1        | 0.898         |
