# Supplementary material
Source: PubMed Central journal article supplement (PMC3030811)
Supplement: supp_bbq069_Appendix_III.pdf [file supp_bbq069_Appendix_III.pdf]

## Data analysis results

### MCL Data

number of genes=2000;

The kendall tau correlation of rank

|          | nonpar | Cox   | aft   | additive |
|----------|--------|-------|-------|----------|
| nonpar   | 1      | 0.604 | 0.546 | 0.603    |
| Cox      |        | 1     | 0.587 | 0.902    |
| aft      |        |       | 1     | 0.576    |
| additive |        |       |       | 1        |

Number of genes identified with FDR=0.1

|          | nonpar | Cox | aft | additive |
|----------|--------|-----|-----|----------|
| nonpar   | 88     | 52  | 0   | 23       |
| Cox      |        | 61  | 0   | 24       |
| aft      |        |     | 0   | 0        |
| additive |        |     |     | 25       |

Consider the top 100 genes selected by nonpar;  
calculate the number of genes also in top 100 under other approaches

| Cox | aft | additive |
|-----|-----|----------|
| 69  | 54  | 72       |

### DLBCL Data

number of genes=2000;

The kendall tau correlation of rank

|          | nonpar | Cox   | aft   | additive |
|----------|--------|-------|-------|----------|
| nonpar   | 1      | 0.397 | 0.293 | 0.394    |
| Cox      |        | 1     | 0.631 | 0.932    |
| aft      |        |       | 1     | 0.637    |
| additive |        |       |       | 1        |

Number of genes identified with FDR=0.1

|          | nonpar | Cox | aft | additive |
|----------|--------|-----|-----|----------|
| nonpar   | 0      | 0   | 0   | 0        |
| Cox      |        | 15  | 0   | 4        |
| aft      |        |     | 0   | 0        |
| additive |        |     |     | 4        |

Consider the top 100 genes selected by nonpar;  
calculate the number of genes also in top 100 under other approaches

| Cox | aft | additive |
|-----|-----|----------|
| 56  | 26  | 47       |

**FL Data**

number of genes=2000;

The kendall tau correlation of rank

|          | nonpar | Cox   | aft   | additive |
|----------|--------|-------|-------|----------|
| nonpar   | 1      | 0.536 | 0.354 | 0.545    |
| Cox      |        | 1     | 0.466 | 0.912    |
| aft      |        |       | 1     | 0.444    |
| additive |        |       |       | 1        |

Number of genes identified with FDR=0.1

|          | nonpar | Cox | aft | additive |
|----------|--------|-----|-----|----------|
| nonpar   | 1      | 0   | 0   | 0        |
| Cox      |        | 0   | 0   | 0        |
| aft      |        |     | 0   | 0        |
| additive |        |     |     | 0        |

Consider the top 100 genes selected by nonpar;  
calculate the number of genes also in top 100 under other approaches

|        | Cox | aft | additive |
|--------|-----|-----|----------|
| nonpar | 55  | 32  | 61       |

**Breast Cancer Data in van't Veer et al.**

number of genes=2000;

The kendall tau correlation of rank

|          | nonpar | Cox   | aft   | additive |
|----------|--------|-------|-------|----------|
| nonpar   | 1      | 0.589 | 0.558 | 0.603    |
| Cox      |        | 1     | 0.646 | 0.832    |
| aft      |        |       | 1     | 0.687    |
| additive |        |       |       | 1        |

Number of genes identified with FDR=0.1

|          | nonpar | Cox | aft | additive |
|----------|--------|-----|-----|----------|
| nonpar   | 18     | 1   | 10  | 1        |
| Cox      |        | 3   | 1   | 0        |
| aft      |        |     | 51  | 1        |
| additive |        |     |     | 1        |

Consider the top 100 genes selected by nonpar;  
calculate the number of genes also in top 100 under other approaches

|        | Cox | aft | additive |
|--------|-----|-----|----------|
| nonpar | 60  | 48  | 71       |

**Breat Cancer Data in Sorlie et al.**

number of genes=2000;

The kendall tau correlation of rank

|          | nonpar | Cox   | aft   | additive |
|----------|--------|-------|-------|----------|
| nonpar   | 1      | 0.632 | 0.377 | 0.602    |
| Cox      |        | 1     | 0.359 | 0.848    |
| aft      |        |       | 1     | 0.372    |
| additive |        |       |       | 1        |

Number of genes identified with FDR=0.1

|          | nonpar | Cox | aft | additive |
|----------|--------|-----|-----|----------|
| nonpar   | 20     | 5   | 1   | 1        |
| Cox      |        | 6   | 0   | 0        |
| aft      |        |     | 5   | 0        |
| additive |        |     |     | 1        |

Consider the top 100 genes selected by nonpar;

calculate the number of genes also in top 100 under other approaches

| Cox | aft | additive |
|-----|-----|----------|
| 70  | 43  | 65       |

**Breast Cancer Data in Huang et al.**

number of genes=2000;

The kendall tau correlation of rank

|          | nonpar | Cox   | aft   | additive |
|----------|--------|-------|-------|----------|
| nonpar   | 1      | 0.666 | 0.507 | 0.664    |
| Cox      |        | 1     | 0.567 | 0.888    |
| aft      |        |       | 1     | 0.572    |
| additive |        |       |       | 1        |

Number of genes identified with FDR=0.1

|          | nonpar | Cox | aft | additive |
|----------|--------|-----|-----|----------|
| nonpar   | 14     | 7   | 0   | 0        |
| Cox      |        | 11  | 0   | 0        |
| aft      |        |     | 0   | 0        |
| additive |        |     |     | 0        |

Consider the top 100 genes selected by nonpar;

calculate the number of genes also in top 100 under other approaches

| Cox | aft | additive |
|-----|-----|----------|
| 68  | 49  | 69       |

### Breast Cancer Data in Sotiriou et al

number of genes=2000;

The kendall tau correlation of rank

|          | nonpar | Cox   | aft   | additive |
|----------|--------|-------|-------|----------|
| nonpar   | 1      | 0.577 | 0.406 | 0.575    |
| Cox      |        | 1     | 0.447 | 0.892    |
| aft      |        |       | 1     | 0.465    |
| additive |        |       |       | 1        |

Number of genes identified with FDR=0.1

|          | nonpar | Cox | aft | additive |
|----------|--------|-----|-----|----------|
| nonpar   | 4      | 1   | 0   | 0        |
| Cox      |        | 1   | 0   | 0        |
| aft      |        |     | 0   | 0        |
| additive |        |     |     | 1        |

Consider the top 100 genes selected by nonpar;

calculate the number of genes also in top 100 under other approaches

| Cox | aft | additive |
|-----|-----|----------|
| 73  | 49  | 72       |
